# Supplementary material for: Arsenicals, the Integrated Stress Response, and Epstein–Barr Virus Lytic Gene Expression
Source: MDPI journal article supplement (doi:10.3390/v13050812), 2021-04-30
Supplement: s1 [file s1]

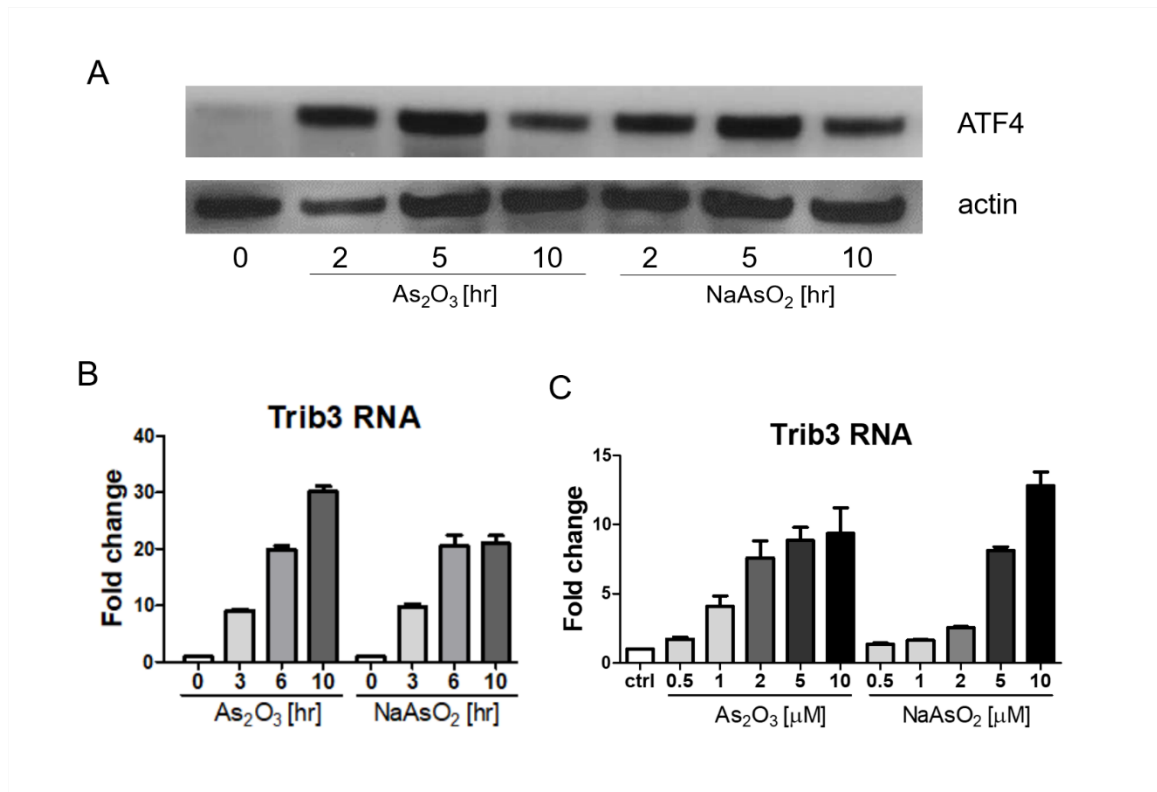

**Figure S1. Arsenic leads to ATF4 and Trib3 expression.** (A) BX1-Akata cells were treated with 10 $\mu M$   $As_2O_3$  or  $NaAsO_2$  for indicated time period and expression of ATF4 proteins were measured by western blot. (B) BX1-Akata cells were treated with 10 $\mu M$   $As_2O_3$  or  $NaAsO_2$  for indicated time period and isolated RNA were used to perform qRT-PCR for detecting Trib3 RNA expression. (C) BX1-Akata cells were treated with indicated doses of  $As_2O_3$  or  $NaAsO_2$  for 24 hours and isolated RNA were used to perform qRT-PCR detecting Trib3 RNA level.

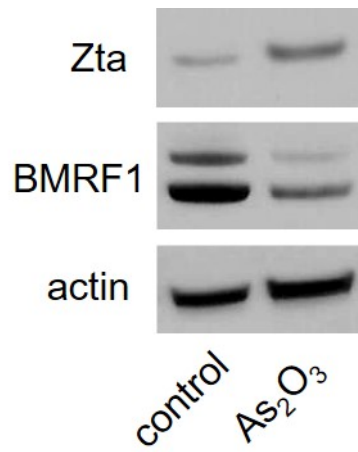

**Figure S2. Arsenic trioxide increases Zta but decreases BMRF1 expression.** Akata cells were treated with  $10\mu M$   $As_2O_3$  for 24 hours and expression of proteins were measured by western blot.
